# Supplementary material for: Multidimensional Bidirectional Functional Ordering Strategy for Deep-Ultraviolet Nonlinear Optical Crystals
Source: Research Square preprint supplement (doi:10.21203/rs.3.rs-8612296/v1), 2026-01-22

**Supporting Information**

**Multidimensional Bidirectional Functional Ordering Strategy for Deep-Ultraviolet Nonlinear Optical Crystals**

Meng Chenga, b#, Linlin Liua, b#, Abudukadi Tudia, b#, Chenxu Lia, b, Xueling Houa, b, Zhihua Yang a, b* & Shilie Pana, b*

a Research Center for Crystal Materials; CAS Key Laboratory of Functional Materials and Devices for Special Environmental Conditions; Xinjiang Key Laboratory of Functional Crystal Materials; Xinjiang Technical Institute of Physics and Chemistry, Chinese Academy of Sciences, 40-1 South Beijing Road, Urumqi 830011, China

b Center of Materials Science and Optoelectronics Engineering, University of Chinese Academy of Sciences, Beijing 100049, China

# These authors contributed equally.

* Corresponding authors, E-mails: zhyang@ms.xjb.ac.cn and slpan@ms.xjb.ac.cn

Contents

**Table S1** Crystallographic data for [C(NH2)3]B6O9F.

**Table S2** Atomic coordinates (× 104), equivalent isotropic displacement parameters (Å2 × 103) and bond valence sum (BVS) calculation for C(NH2)3B6O9F. U(eq) is defined as one third of the trace of the orthogonalized Uij tensor.

**Table S3** Selected bond distances (Å) and angles (deg) for C(NH2)3B6O9F.

**Table S4** The atom charges for LiB6O9F obtained from the electron density by the Bader method.

**Table S5** The atom charges for [C(NH2)3]B6O9F obtained from the electron density by the Bader method.

**Table S6** The data of HOMO-LUMO energy gap, polarizability anisotropy for [B6O11F] groups and hyperpolarizability with torsion angle.

**Table S7** Basic information (energy above the hull (*E*ₕᵤₗₗ, in eV/atom), space group (SG), band gap (*E*g, in eV) calculated at the HSE06 level) and key parameters (SHG (pm/V), birefringence (Δ*n*) at 1064 nm, and shortest SHG phase-matching wavelength (*λ*PM)) of [C(NH2)3]B6O9F (designated GBOF-i, where i = 1-30). FWPM denotes full-wavelength phase-matching.

**Table S8** Birefringence among all anhydrous and ordered fluorooxoborate compounds with deep-UV cut-off edges.

**Figure S1** The 2D [B6O9F]∞ layers for [C(NH2)3]B6O9F(up) and LiB6O9F(down) in *ac* plane.

**Figure S2** The Powder X-ray diffraction patterns for [C(NH2)3]B6O9F at different temperature.

**Figure S3** The IR Spectra of [C(NH2)3]B6O9F.

**Figure S4** The TG-DSC curve of [C(NH2)3]B6O9F.

**Figure S5** The ELF map of [C(NH2)3] group in [C(NH2)3]B6O9F.

**Figure S6** The ELF map of 2D [B6O9F]∞ anion layer in [C(NH2)3]B6O9F.

**Figure S7.** The low-lying allotropes of [C(NH2)3]B6O9F. Top and side views of crystal structures for [C(NH2)3]B6O9F with the same anionic frameworks [B6O9F] and different cation [C(NH2)3] functional motifs are presented.

**Figure S8.** Phonon dispersion spectra for predicted stable GBOF-i (i=1-30) calculated with linear response method.

**Figure S9.** The SHG density maps of occupied and unoccupied orbitals of the largest effective NLO coefficient *d*33 in a virtual-electron process of GBOF-i (i=1, 3, 4, 5, 12).

**Table S1.** Crystallographic data for [C(NH2)3]B6O9F.

| Formula | [C(NH2)3]B6O9F |
| --- | --- |
| Formula weight | 287.95 |
| Temperature / K | 273.15 |
| CCDC number | 2523050 |
| Crystal system | orthorhombic |
| Space group | *Pna*21 |
| *a* / Å | 7.8420(11) |
| *b* / Å | 15.1862(19) |
| *c* / Å | 8.5762(9) |
| *α* / ° | 90 |
| *β* / ° | 90 |
| *γ* / ° | 90 |
| Volume / Å3 | 1021.3(2) |
| *Z* | 4 |
| *ρ*calc g/cm3 | 1.873 |
| *μ* / mm‑1 | 0.179 |
| *F* (000) | 576.0 |
| Radiation | Mo K*α* (*λ* = 0.71073) |
| 2*θ* range for date collection/ ° | 5.456 to 55.046 |
| Index ranges | -10 ≤ *h* ≤ 10, -19 ≤ *k* ≤ 19, -10 ≤ *l* ≤ 11 |
| Reflections collected | 7276 |
| Independent reflections | 2293 [*Rint* = 0.0644, *Rsigma* = 0.0559] |
| Data / restraints / parameters | 2293 / 1 / 182 |
| Goodness-of-fit on *F*2 | 1.071 |
| Final *R* indices [*I* ≥ 2*σ* (*I*)]a | *R1*= 0.0468, *wR2=* 0.1096 |
| Final *R* indices (all data)a | *R1*= 0.0653, *wR2=* 0.1270 |
| Largest diff. peak / hole /e Å-3 | 0.21 / - 0.23 |

*aR*1 = Σ||*F*o| - |*F*c||/Σ|*F*o| and *wR*2 = [Σ*w*(*F*o2 – *F*c2)2 / Σ*wF*o4]1/2 for *F*o2> 2σ( *F*o2)

**Table S2.** Atomic coordinates (×104) and equivalent isotropic displacement parameters (Å2 ×103) for [C(NH2)3]B6O9F. U(eq) is defined as one third of the trace of the orthogonalized Uij tensor.

| **Atoms** | **x** | **y** | **z** | **U(eq)** | **BVS** |
| --- | --- | --- | --- | --- | --- |
| B1 | 7626(6) | 4890(3) | 4522(6) | 25.7(9) | 3.04 |
| B2 | 8315(6) | 4386(3) | 1984(6) | 25.0(9) | 3.04 |
| B3 | 7599(7) | 3350(3) | 3929(5) | 29.3(11) | 3.05 |
| B4 | 7491(7) | 1693(3) | 3903(6) | 31.5(11) | 3.09 |
| B5 | 7003(6) | 182(3) | 4442(5) | 26.0(10) | 3.08 |
| B6 | 8398(6) | 592(3) | 2005(6) | 27.0(10) | 3.10 |
| C1 | 4780(7) | 2574(3) | 8321(7) | 41.5(13) | 4.45 |
| N1 | 3911(11) | 2531(4) | 9604(7) | 89(2) |  |
| N2 | 5124(8) | 3332(4) | 7678(9) | 90(2) |  |
| N3 | 5192(9) | 1857(4) | 7615(8) | 88(2) |  |
| O1 | 7347(4) | 5570.6(18) | 5456(4) | 30.9(7) | 1.93 |
| O2 | 8298(4) | 5050.0(18) | 3049(3) | 27.4(7) | 1.98 |
| O3 | 7258(4) | 4029(2) | 4933(3) | 33.1(8) | 1.97 |
| O4 | 8522(4) | 4512.8(18) | 430(3) | 29.1(7) | 2.00 |
| O5 | 8224(4) | 3518.1(19) | 2470(3) | 32.3(8) | 1.97 |
| O6 | 7272(5) | 2529.4(18) | 4475(4) | 38.9(9) | 2.04 |
| O7 | 8264(4) | 1495.3(19) | 2582(3) | 33.2(8) | 1.93 |
| O8 | 6845(5) | 1045(2) | 4889(4) | 36.1(8) | 1.94 |
| O9 | 7609(5) | -40(2) | 3049(4) | 36.6(8) | 1.93 |
| F1 | 10133(3) | 366(2) | 1874(5) | 52.4(9) | 1.71 |
| H1A | 3617 | 2028 | 9975 | 107 |  |
| H1B | 3629 | 3007 | 10085 | 107 |  |
| H3A | 4891 | 1356 | 7996 | 106 |  |
| H3B | 5768 | 1877 | 6762 | 106 |  |
| H2A | 5625 | 3352 | 6787 | 108 |  |
| H2B | 4851 | 3813 | 8146 | 108 |  |

**Table S3.** Bond lengths[Å] and angles [deg] for[C(NH2)3]B6O9F.

| Bond | Bond length (Å) | Bond | Bond length (Å) |
| --- | --- | --- | --- |
| B1-O2 | 1.390(6) | B4-O7 | 1.319(6) |
| B2-O2 | 1.360(5) | B1-O3 | 1.385(5) |
| B6-F1 | 1.408(6) | B3-O3 | 1.370(6) |
| B1-O1 | 1.325(5) | B4-O6 | 1.372(6) |
| B61-O1 | 1.452(6) | B3-O6 | 1.355(6) |
| B2-O4 | 1.356(6) | B5-O8 | 1.372(5) |
| B52-O4 | 1.386(5) | B4-O8 | 1.393(6) |
| B2-O5 | 1.385(5) | C1-N1 | 1.296(8) |
| B3-O5 | 1.368(6) | C1-N3 | 1.288(7) |
| B5-O9 | 1.329(6) | C1-N2 | 1.304(7) |
| B6-O9 | 1.452(6) | B5-O43 | 1.386(5) |
| B6-O7 | 1.462(5) | B6-O14 | 1.452(6) |
|  | Bond angle (degree) |  | Bond angle (degree) |
| N1-C1-N2 | 120.8(6) | F1-B6-O14 | 108.1(4) |
| N3-C1-N1 | 119.2(6) | F1-B6-O9 | 107.5(4) |
| N3-C1-N2 | 119.8(6) | F1-B6-O7 | 109.0(4) |
| O1-B1-O2 | 118.4(4) | O14-B6-O9 | 112.2(4) |
| O1-B1-O3 | 123.2(4) | O14-B6-O7 | 107.6(3) |
| O3-B1-O2 | 118.4(4) | O9-B6-O7 | 112.4(4) |
| O2-B2-O5 | 120.2(4) | O7-B4-O6 | 125.1(4) |
| O4-B2-O2 | 123.8(4) | O7-B4-O8 | 121.8(4) |
| O4-B2-O5 | 115.9(4) | O6-B4-O8 | 113.0(4) |
| O9-B5-O43 | 118.0(4) | O5-B3-O3 | 120.3(4) |
| O9-B5-O8 | 121.8(4) | O6-B3-O5 | 123.8(4) |
| O8-B5-O43 | 120.2(4) | O6-B3O3 | 116.0(4) |

Symmetry transformations used to generate equivalent atoms:

13/2-X,1/2+Y,1/2+Z; 23/2-X,1/2+Y,-1/2+Z; 33/2-X,-1/2+Y,1/2+Z; 43/2-X,-1/2+Y,-1/2+Z

**Table S4.** The atom charges for [C(NH2)3]B6O9F obtained from the electron density by the Bader method.

| **Atoms** | ***U*11** | ***U*22** | ***U*33** | ***U*23** | ***U*13** | ***U*12** |
| --- | --- | --- | --- | --- | --- | --- |
| B1 | 41(2) | 18(2) | 18(2) | 0.0(18) | -2(2) | -1.0(18) |
| B2 | 35(2) | 20(2) | 20(2) | 1(2) | 0.8(18) | 2.8(18) |
| B3 | 53(3) | 16(2) | 18(2) | 0.6(18) | 1(2) | 3(2) |
| B4 | 55(3) | 18(2) | 22(2) | -2.1(19) | 3(2) | -4(2) |
| B5 | 39(2) | 19(2) | 20(2) | 1.5(19) | -2(2) | -0.2(17) |
| B6 | 38(2) | 21(2) | 22(2) | -2(2) | 2.7(19) | -0.9(19) |
| C1 | 66(3) | 25(2) | 34(3) | 2(2) | 15(2) | 1(2) |
| N1 | 139(6) | 83(5) | 46(3) | -14(3) | 47(4) | -20(4) |
| N2 | 97(5) | 48(3) | 125(6) | 41(4) | 22(4) | -9(3) |
| N3 | 141(6) | 59(4) | 64(4) | -23(3) | 7(4) | 45(4) |
| O1 | 54.1(19) | 16.8(14) | 21.7(15) | -1.7(13) | 2.7(14) | 2.0(13) |
| O2 | 44.5(17) | 19.3(14) | 18.5(14) | -0.5(12) | 2.4(14) | -3.7(12) |
| O3 | 63(2) | 17.1(14) | 18.8(14) | -0.6(12) | 9.6(15) | -0.4(13) |
| O4 | 48.1(18) | 20.7(15) | 18.6(14) | 2.3(13) | 5.9(13) | 5.5(12) |
| O5 | 57.4(19) | 19.6(16) | 19.8(15) | 1.1(13) | 7.5(13) | 2.6(13) |
| O6 | 81(3) | 15.4(15) | 20.8(15) | -1.2(12) | 16.0(16) | -2.4(14) |
| O7 | 56.6(19) | 20.3(16) | 22.6(16) | -3.2(13) | 11.0(13) | -7.2(13) |
| O8 | 66(2) | 18.7(15) | 23.8(15) | -0.8(13) | 13.9(15) | -2.4(14) |
| O9 | 70(2) | 19.8(15) | 19.8(14) | -1.5(13) | 6.1(16) | -2.2(14) |
| F1 | 37.8(14) | 57.4(19) | 62(2) | -12.0(17) | -1.4(15) | 6.9(14) |

**Table S4.** The atom charges for LiB6O9F obtained from the electron density by the Bader method.

| **Atoms** | **Get Charge** | **Atoms** | **Get Charge** |
| --- | --- | --- | --- |
| Li1 | -0.8214 | O3 | 1.626014 |
| Li2 | -0.82108 | O4 | 1.627108 |
| Li3 | -0.82266 | O5 | 1.618611 |
| Li4 | -0.81983 | O6 | 1.615519 |
| B1 | -2.43724 | O7 | 1.61902 |
| B2 | -2.4286 | O8 | 1.619386 |
| B3 | -2.43275 | O9 | 1.564053 |
| B4 | -2.43312 | O10 | 1.55716 |
| B5 | -2.34191 | O11 | 1.553209 |
| B6 | -2.33961 | O12 | 1.56433 |
| B7 | -2.34556 | O13 | 1.592112 |
| B8 | -2.34001 | O14 | 1.591771 |
| B9 | -2.41061 | O15 | 1.590184 |
| B10 | -2.41241 | O16 | 1.594011 |
| B11 | -2.40773 | O17 | 1.574316 |
| B12 | -2.41234 | O18 | 1.597406 |
| B13 | -2.37244 | O19 | 1.595508 |
| B14 | -2.38391 | O20 | 1.581235 |
| B15 | -2.38564 | O21 | 1.593958 |
| B16 | -2.37434 | O22 | 1.595771 |
| B17 | -2.41769 | O23 | 1.593349 |
| B18 | -2.42832 | O24 | 1.5961 |
| B19 | -2.42797 | O25 | 1.58661 |
| B20 | -2.41752 | O26 | 1.587389 |
| B21 | -2.35993 | O27 | 1.58206 |
| B22 | -2.37663 | O28 | 1.59111 |
| B23 | -2.38254 | O29 | 1.608737 |
| B24 | -2.35551 | O30 | 1.592474 |
| F1 | 0.853821 | O31 | 1.594934 |
| F2 | 0.849068 | O32 | 1.607113 |
| F3 | 0.852417 | O33 | 1.554524 |
| F4 | 0.851512 | O34 | 1.559325 |
| O1 | 1.622172 | O35 | 1.561975 |
| O2 | 1.624739 | O36 | 1.549097 |

The analysis of Bader charges indicates that Li lost 0.821 charges.

**Table S5.** The atom charges for [C(NH2)3]B6O9F obtained from the electron density by the Bader method.

| **Atoms** | **Get Charge** | **Atoms** | **Get Charge** | **Atoms** | **Get Charge** |
| --- | --- | --- | --- | --- | --- |
| B1 | -2.23083 | N9 | 1.065713 | O33 | 1.480361 |
| B2 | -2.22613 | N10 | 1.053079 | O34 | 1.466143 |
| B3 | -2.22563 | N11 | 1.047494 | O35 | 1.461008 |
| B4 | -2.23568 | N12 | 1.067506 | O36 | 1.484986 |
| B5 | -2.21601 | O1 | 1.462293 | F1 | 0.80242 |
| B6 | -2.22453 | O2 | 1.471739 | F2 | 0.805624 |
| B7 | -2.2137 | O3 | 1.461868 | F3 | 0.799705 |
| B8 | -2.22371 | O4 | 1.472753 | F4 | 0.804257 |
| B9 | -2.23672 | O5 | 1.426246 | H1 | -0.32062 |
| B10 | -2.22178 | O6 | 1.42529 | H2 | -0.34815 |
| B11 | -2.21299 | O7 | 1.432158 | H3 | -0.3618 |
| B12 | -2.2371 | O8 | 1.418659 | H4 | -0.31585 |
| B13 | -2.24388 | O9 | 1.43262 | H5 | -0.38021 |
| B14 | -2.23291 | O10 | 1.426728 | H6 | -0.37545 |
| B15 | -2.23634 | O11 | 1.433286 | H7 | -0.3754 |
| B16 | -2.24574 | O12 | 1.440859 | H8 | -0.38139 |
| B17 | -2.31171 | O13 | 1.55274 | H9 | -0.40636 |
| B18 | -2.30755 | O14 | 1.5227 | H10 | -0.40913 |
| B19 | -2.3059 | O15 | 1.540123 | H11 | -0.41041 |
| B20 | -2.31355 | O16 | 1.559394 | H12 | -0.41055 |
| B21 | -2.38131 | O17 | 1.493699 | H13 | -0.41417 |
| B22 | -2.36197 | O18 | 1.479211 | H14 | -0.40256 |
| B23 | -2.38348 | O19 | 1.491242 | H15 | -0.4109 |
| B24 | -2.38666 | O20 | 1.488899 | H16 | -0.40961 |
| C1 | -1.81486 | O21 | 1.529833 | H17 | -0.40215 |
| C2 | -1.81893 | O22 | 1.52009 | H18 | -0.41206 |
| C3 | -1.82088 | O23 | 1.522231 | H19 | -0.40712 |
| C4 | -1.81984 | O24 | 1.530493 | H20 | -0.40399 |
| N1 | 1.075813 | O25 | 1.524347 | H21 | -0.29886 |
| N2 | 1.100801 | O26 | 1.527708 | H22 | -0.27402 |
| N3 | 1.112914 | O27 | 1.524166 | H23 | -0.27124 |
| N4 | 1.076585 | O28 | 1.522022 | H24 | -0.2971 |
| N5 | 1.195094 | O29 | 1.61196 |  |  |
| N6 | 1.17253 | O30 | 1.621828 |  |  |
| N7 | 1.187657 | O31 | 1.620961 |  |  |
| N8 | 1.194438 | O32 | 1.616858 |  |  |

The analysis of Bader charges indicates that [C(NH2)3] lost 0.706 charges.

**Table S6.** The data of HOMO-LUMO energy gap, polarizability anisotropy for [B6O11F] groups and hyperpolarizability with torsion angle.

| **Torsion angle (°)** | **HOMO-LUMO（eV）** | **Polarizability anisotropy** | **Hyperpolarizability** |
| --- | --- | --- | --- |
| 0 | 5.59111 | 36.99413 | 136.5524 |
| 10 | 5.63057 | 39.7077 | 134.008 |
| 29.1 | 5.74566 | 43.32994 | 126.8629 |
| 33.04 | 5.77233 | 43.78615 | 125.2404 |
| 40 | 5.82076 | 44.34164 | 123.027 |
| 50.49 | 5.89396 | 44.58087 | 122.711 |
| 70 | 6.02239 | 43.39696 | 134.6375 |
| 90.25 | 6.13123 | 40.55963 | 163.042 |
| 100.11 | 6.17068 | 38.86582 | 176.9565 |
| 110.96 | 6.19844 | 36.99535 | 187.3831 |
| 115 | 6.20442 | 36.33857 | 189.5156 |
| 120 | 6.20905 | 35.58677 | 190.417 |
| 125 | 6.21095 | 34.91798 | 189.5454 |
| 130 | 6.20851 | 34.34793 | 187.2889 |
| 140.55 | 6.17098 | 33.5669 | 178.7235 |
| 160 | 6.1198 | 33.77973 | 159.3755 |
| 180 | 6.00171 | 35.61299 | 150.3658 |

**Table S7** Basic information (energy above the hull (*E*ₕᵤₗₗ, in eV/atom), space group (SG), band gap (*E*g, in eV) calculated at the HSE06 level) and key parameters (SHG (pm/V), birefringence (Δ*n*) at 1064 nm, and shortest SHG phase-matching wavelength (*λ*PM)) of [C(NH₂)₃]B₆O₉F (designated GBOF-i, where i = 1-30). FWPM denotes full-wavelength phase-matching.

| Crystal | *E*hull | SG | *E*g | SHG | ∆*n* | *λ*PM |
| --- | --- | --- | --- | --- | --- | --- |
| GBOF-1 | 16.81 | *Pna*21 | 6.65 | *d*24=0.89, *d*33=-1.00, *d*15=-0.07 | 0.143 | FWPM |
| GBOF-2 | 17.45 | *P*21/*c* | 6.51 |  | 0.162 |  |
| GBOF-3 | 17.73 | *Pna*21 | 6.71 | *d*24=0.22, *d*33=-0.40, *d*15=-0.0036 | 0.137 | 192 |
| GBOF-4 | 18.23 | *Pna*21 | 6.47 | *d*24=-0.49, *d*33=0.72, *d*15=-0.19 | 0.152 | FWPM |
| GBOF-5 | 18.30 | *Pc* | 6.82 | *d*15=-0.42, *d*12=-0.17, *d*13=-0.12, *d*24=0.05, *d*33=-0.69 | 0.134 | 190 |
| GBOF-6 | 18.35 | *P*21/*c* | 7.26 |  | 0.109 |  |
| GBOF-7 | 18.39 | *P*21/*c* | 6.84 |  | 0.165 |  |
| GBOF-8 | 18.44 | *Pna*21 | 6.89 | *d*24=-0.12, *d*33=-0.20, *d*15=0.07 | 0.129 | 209 |
| GBOF-9 | 18.66 | *P*21/*c* | 7.09 |  | 0.112 |  |
| GBOF-10 | 18.77 | *Pc* | 6.12 | *d*11=-0.53, *d*12=0.27, *d*13=0.27, *d*15=0.08, *d*24=-0.15, *d*33=0.13 | 0.120 | 203 |
| GBOF-11 | 18.80 | *P*21/*c* | 6.72 |  | 0.093 |  |
| GBOF-12 | 18.80 | *Pna*21 | 6.42 | *d*24=0.34, *d*33=-0.73, *d*15=0.15 | 0.141 | FWPM |
| GBOF-13 | 18.94 | *Pna*21 | 6.60 | *d*33=0.25, *d*15=-0.25 | 0.159 | FWPM |
| GBOF-14 | 19.23 | *Cc* | 7.06 | *d*11=0.25, *d*12=-0.32, *d*13=0.08, *d*15=-0.17, *d*24=0.31, *d*33=0.11 | 0.171 | FWPM |
| GBOF-15 | 19.33 | *Pc* | 6.60 | *d*12=0.2, *d*13=-0.2, *d*24=0.54, *d*33=0.50 | 0.137 | 195 |
| GBOF-16 | 19.40 | *Cc* | 6.65 | *d*11=0.11, *d*12=-0.06, *d*13=0.19, *d*24=0.27, *d*33=-0.38 | 0.147 | FWPM |
| GBOF-17 | 19.60 | *Pna*21 | 6.36 | *d*15=0.08, *d*33=-0.12 | 0.158 | FWPM |
| GBOF-18 | 19.91 | *Pc* | 6.60 | *d*11=0.36,*d*12=-0.08,*d*13=-0.32, *d*15=-0.76,*d*24=0.25,*d*33=0.54 | 0.022 | 417 |
| GBOF-19 | 19.91 | *P*21/*c* | 6.98 |  | 0.133 |  |
| GBOF-20 | 20.06 | *P*21 | 6.76 |  | 0.159 |  |
| GBOF-21 | 20.10 | *P*21/*c* | 6.77 |  | 0.160 |  |
| GBOF-22 | 20.22 | *Cc* | 6.92 | *d*11=0.2, *d*15=-0.22, *d*13=-0.05, *d*24=-0.25, *d*33=-0.31 | 0.153 | FWPM |
| GBOF-23 | 20.26 | *P*21/*c* | 6.47 |  | 0.143 |  |
| GBOF-24 | 20.29 | *Cc* | 6.92 | *d*11=0.52, *d*12=-0.56, *d*13=-0.13, *d*24=-0.27, *d*33=-0.12 | 0.153 | FWPM |
| GBOF-25 | 20.37 | *Pna*21 | 6.71 | *d*24=-0.6, *d*33=-0.27, *d*15=0.07 | 0.132 | 199 |
| GBOF-26 | 20.62 | *P*21/*c* | 7.08 |  | 0.133 |  |
| GBOF-27 | 21.46 | *Pc* | 6.50 | *d*11=0.13,*d*12=-0.15,*d*15=-0.43, *d*24=0.16, *d*33=0.57 | 0.153 | FWPM |
| GBOF-28 | 21.72 | *Pna*21 | 6.78 | *d*24=-0.17, *d*33=0.62, *d*15=0.62 | 0.096 | 225 |
| GBOF-29 | 22.04 | *Pc* | 6.64 | *d*11=0.31, *d*12=-0.19, *d*13=0.11, *d*15=0.13, *d*24=-0.29, *d*33=0.3 | 0.167 | FWPM |
| GBOF-30 | 22.24 | *Pna*21 | 6.71 | *d*24=-0.39, *d*33=0.28, *d*15=0.20 | 0.155 | 196 |

**Table S8** Birefringence among all anhydrous and ordered fluorooxoborate compounds with deep-UV cut-off edges.

| Compounds | Space group | Cut-off edge (nm) | Birefringence (@ 1064 nm) |
| --- | --- | --- | --- |
| Cs4B4O3F10 | *P*21/*c* | ＜200 | / |
| Na3B7O11F2 | *Pnma* | ＜200 | 0.083@193nm |
| K10B13O15F19 | *R*3*m* | ＜190 | 0.03 |
| Rb10B13O15F19 | *R*3*m* | ＜190 | 0.026 |
| [C(NH2)3][BF4] | *R*3*m* | 193 | 0.11 |
| Na3B3O3F6 | *C*2/*c* | 7.83 eV | / |
| Rb3B3O3F6 | *P*21/*c* | ＜190 | / |
| K2RbB3O3F6 | *Pbcn* | / | / |
| KCs2B3O3F6 | *P*21/*c* | ＜190 | / |
| Cs3B3O3F6 | *Pbcn* | ＜190 | 0.0069 |
| Na4B8O9F10 | *Pna*21 | ＜200 | 0.036 |
| Ba2B9O13F4•BF4 | *P*-1 | ＜ 190 nm | 0.052 |
| *β*-KB3O4F2 | *P*21/*n* | 7.88 eV | 0.096 @ 546 nm |
| *α*-KB3O4F2 | *P*21/*n* | 6.45 | 0.011 @ 546 nm |
| RbB3O4F2 | *P*21/*c* | ＜190 | 0.09 |
| Cs2B3O4F3 | *P*21/*c* | 6.63 | 0.016 |
| KNaB3O4F3 | Pbcn | ＜200 | 0.04 |
| K2B3O4F3 | *Pbcn* | ＜200 | 0.031 |
| KCsB3O4F3 | *Pbcn* | ＜200 | 0.032 |
| NaRbB3O4F3 | *P*21/*c* | ＜175 | / |
| Li2B3O4F3 | *P*212121 | 8.425 eV | 0.05 |
| *α*-BaBOF3 | *P*21 | ＞6.53 | / |
| *β*-BaBOF3 | *P*21/*c* | ＞6.53 | / |
| *γ*-BaBOF3 | *P*21/*c* | ＞6.53 | / |
| *α*-BaB4O5F4 | *P*21 | 8.4 eV | 0.044 |
| *β*-BaB4O5F4 | *P*21/*c* | ＞6.72 | 0.047 |
| Ba3B10O17F2·0.1KF | *P*-1 | ＜200 | 0.054 |
| K6B12O19F4 | *Pnma* | 5.6 eV | / |
| LiB6O9F | *Pna*21 | 8.37 eV | 0.04 |
| (NH4)2B6O9F2 | *P*21/*c* | ＜ 180 | 0.050 |
| K2B6O9F2 | *Pbcn* | 7.41 eV | 0.053 |
| NaKB6O9F2 | *P*21/*c* | ＞ 6.5 eV | 0.096-0.053@190-2000nm |
| NaRbB6O9F2 | *P*21/*n* | ＜180 | 0.064 |
| Na2B6O9F2 | *P*21/*c* | 7.34 | / |
| NaB4O6F | *C*2/*c* | ＜ 200 | 0.124 |
| NaB4O6F | *C*2 | ＜180 | 0.12 |
| NH4B4O6F | *Pna*21 | 7.87 eV | 0.107 |
| RbB4O6F | *Pna*21 | ＜200 | 0.102 |
| CsB4O6F | *Pna*21 | 8.01 eV | 0.0976 |
| CsKB8O12F2 | *P*321 | ＜200 | 0.105 |
| CsRbB8O12F2 | *P*-62*c* | ＜200 | / |
| CsNH4B8O12F2 | *P*321 | ＜190 | 0.127 |
| RbNH4B8O12F2 | *Pna*21 | ＜190 | 0.104 |
| CaB4O6F2 | *P*-1 | ＜190 | 0.091 |
| SrB4O6F2 | *P*-1 | ＜190 | 0.089 |
| BaB4O6F2 | *P*21/*n* | ＜190 | 0.085 |
| BaB8O12F2 | *R*-3*c* | ＜180 | 0.116 |
| K3B6O9F3 | *P*21/*c* | 6.98 eV | / |
| *α*-K3B6O9F3 | *Pc* | 6.8 eV | / |
| BaB2O3F2 | *P*21 | ＜180 | / |
| Rb3B5O8F2 | *P*21 | ＜200 | / |
| Li2NaB5O8F2 | *Pbcn* | 7.48 eV | 0.047 |
| Li2KB5O8F2 | *Pbcn* | ＜196 | 0.049 |
| MgB5O7F3 | *Cmc*21 | ＜200 | 0.07 |
| CaB5O7F3 | *Cmc*21 | ＜180 | 0.07 |
| SrB5O7F3 | *Cmc*21 | ＜180 | 0.07 |
| Ba2B7O12F | *C*2/*c* | 6.67 eV | / |
| LiNaB6O9F2 | *Pnn*2 | ＜ 190 | 0.067 |
| Na2BaB12O18F4 | *Pbcn* | ＜ 190 | 0.054 |
| Li2B6O9F2 | *Cc* | ＜190 | 0.07 |
| K3NaB10O16F2 | *C*2/*c* | 6.93 eV | 0.047 |
| **[C(NH2)3]B6O9F** | ***Pna*21** | **＜190** | **0.133** |

“/” Indicates not reported.

**Figure S1.** The 2D [B6O9F]∞ layers for [C(NH2)3]B6O9F(up) and LiB6O9F(down) in *ac* plane.


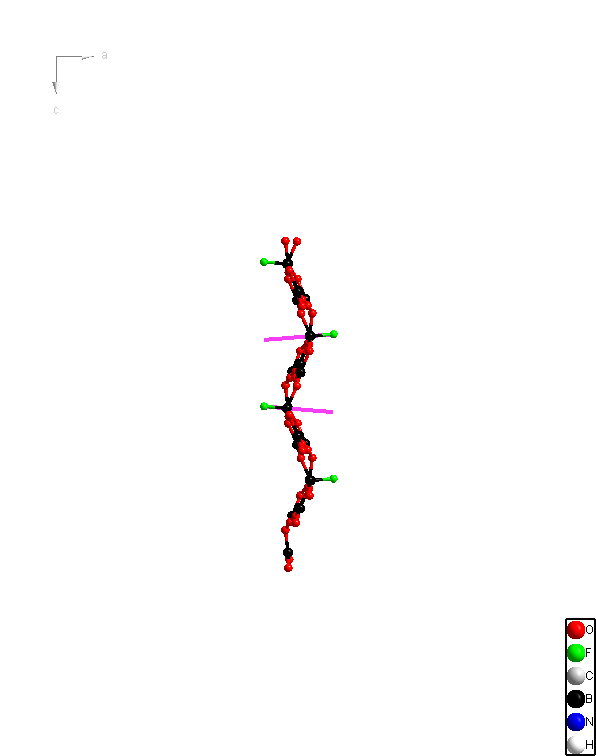


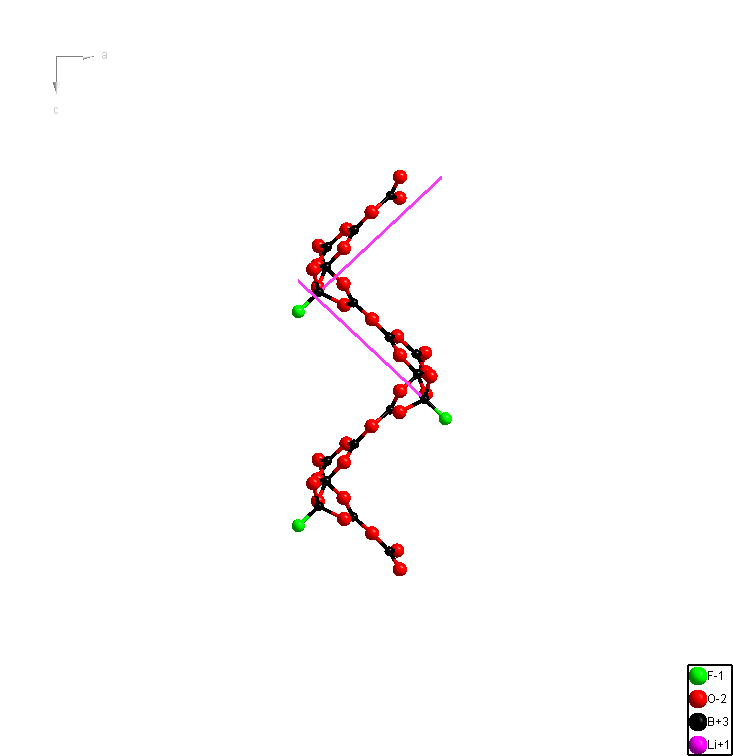


**Figure S2.** The Powder X-ray diffraction patterns for [C(NH2)3]B6O9F at different temperature.


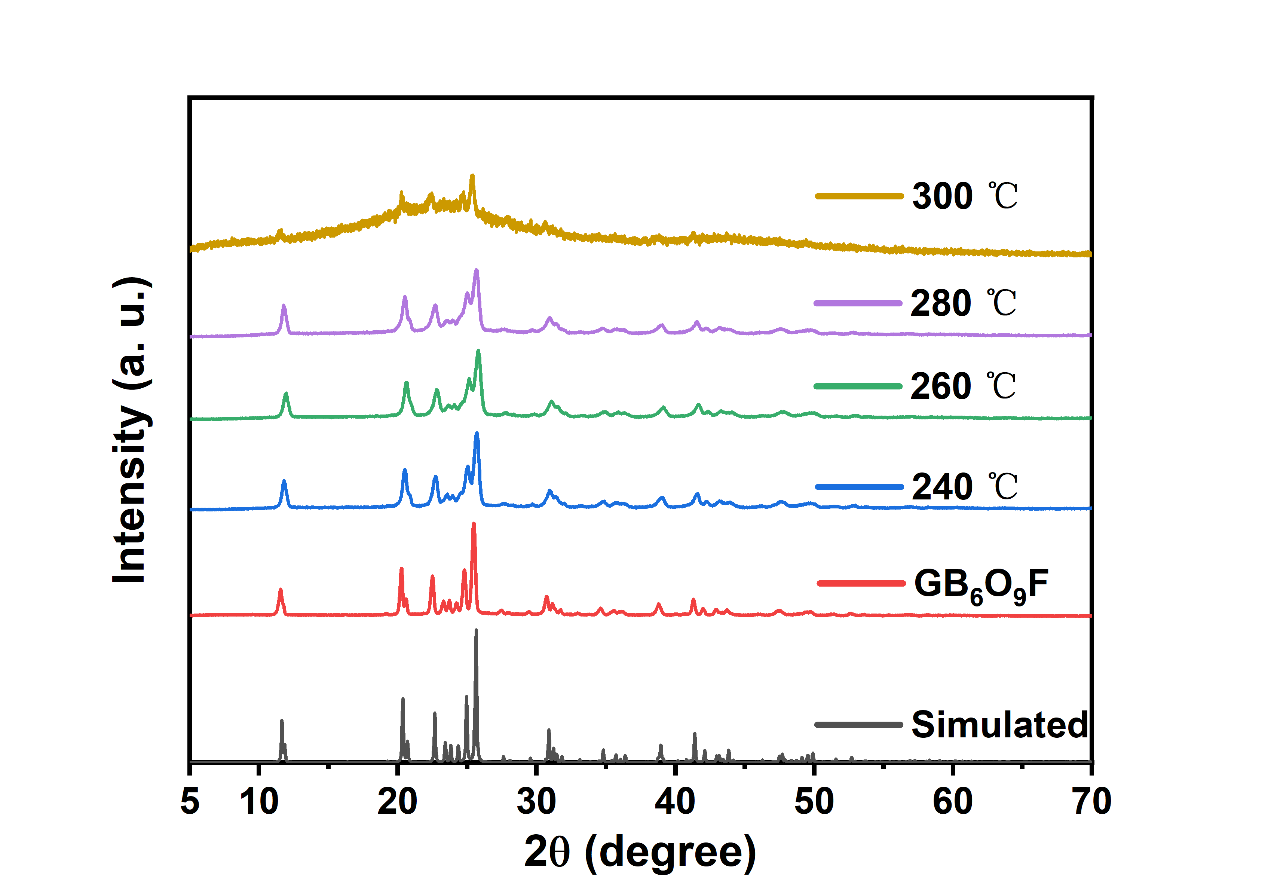


**Figure S3.** The IR Spectra of [C(NH2)3]B6O9F.


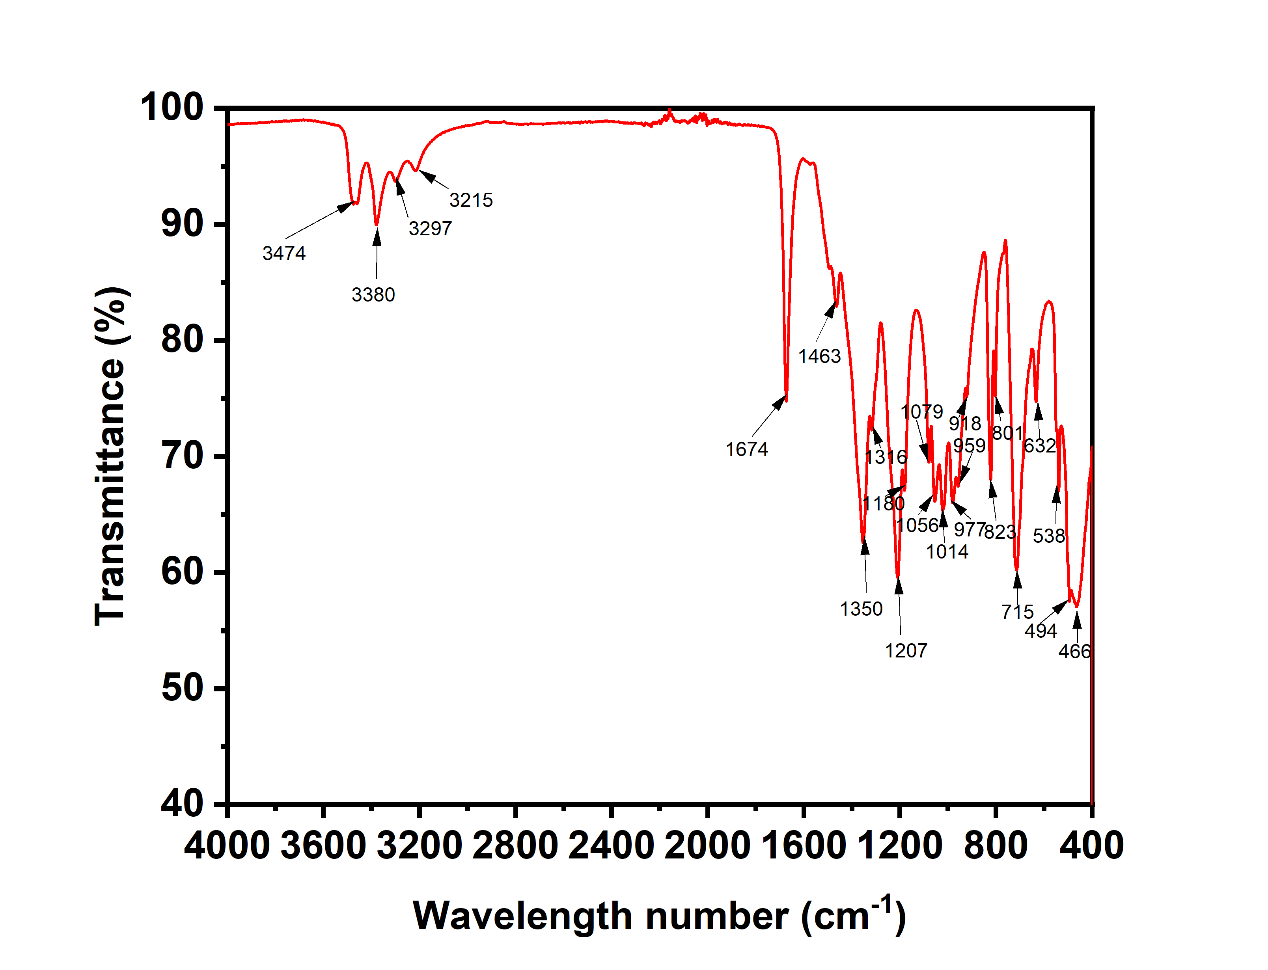


**Figure S4.** The TG-DSC curve of [C(NH2)3]B6O9F.


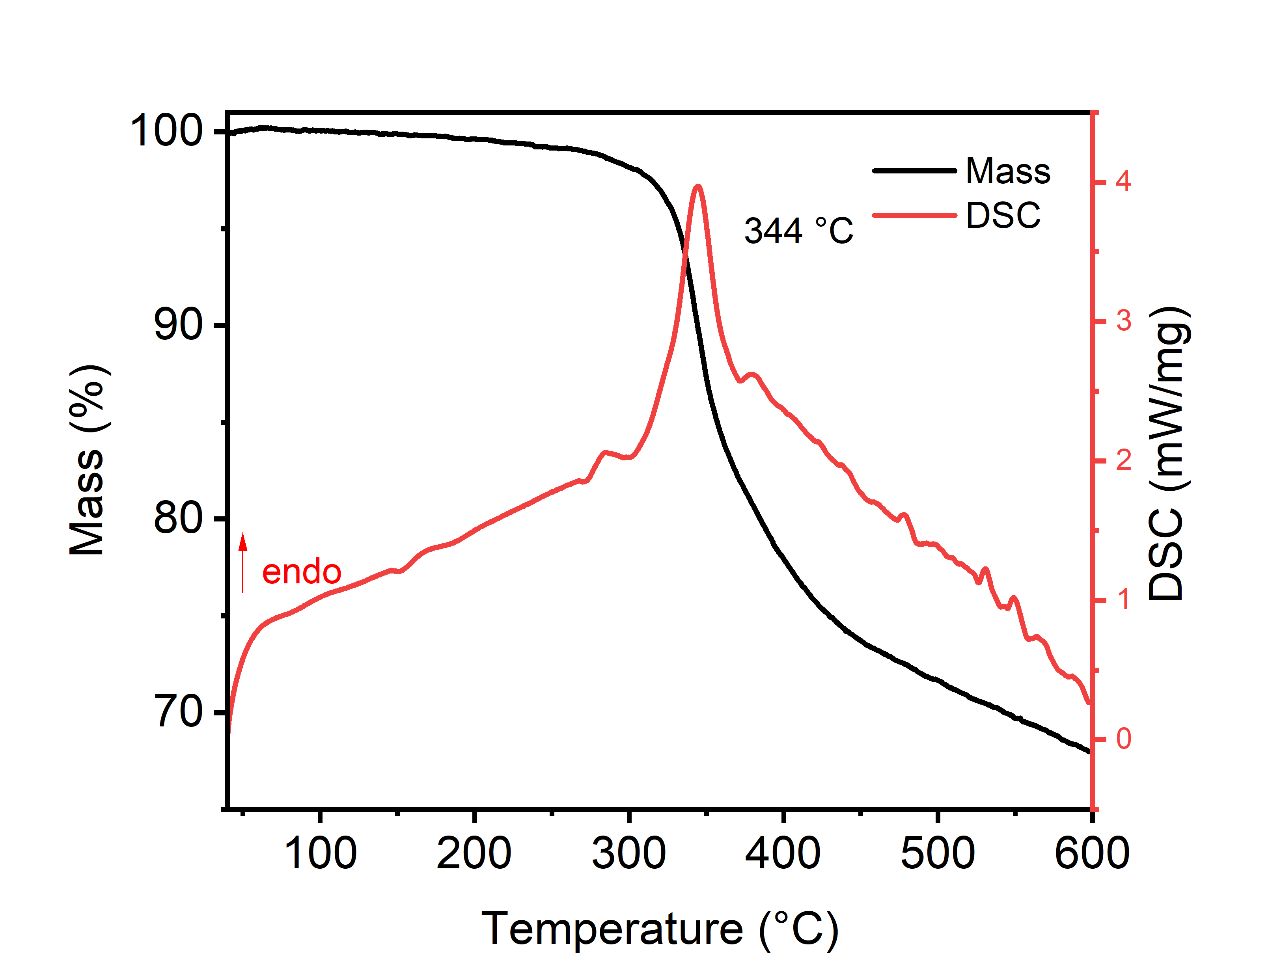


**Figure S5.** The ELF map of [C(NH2)3] group in [C(NH2)3]B6O9F.


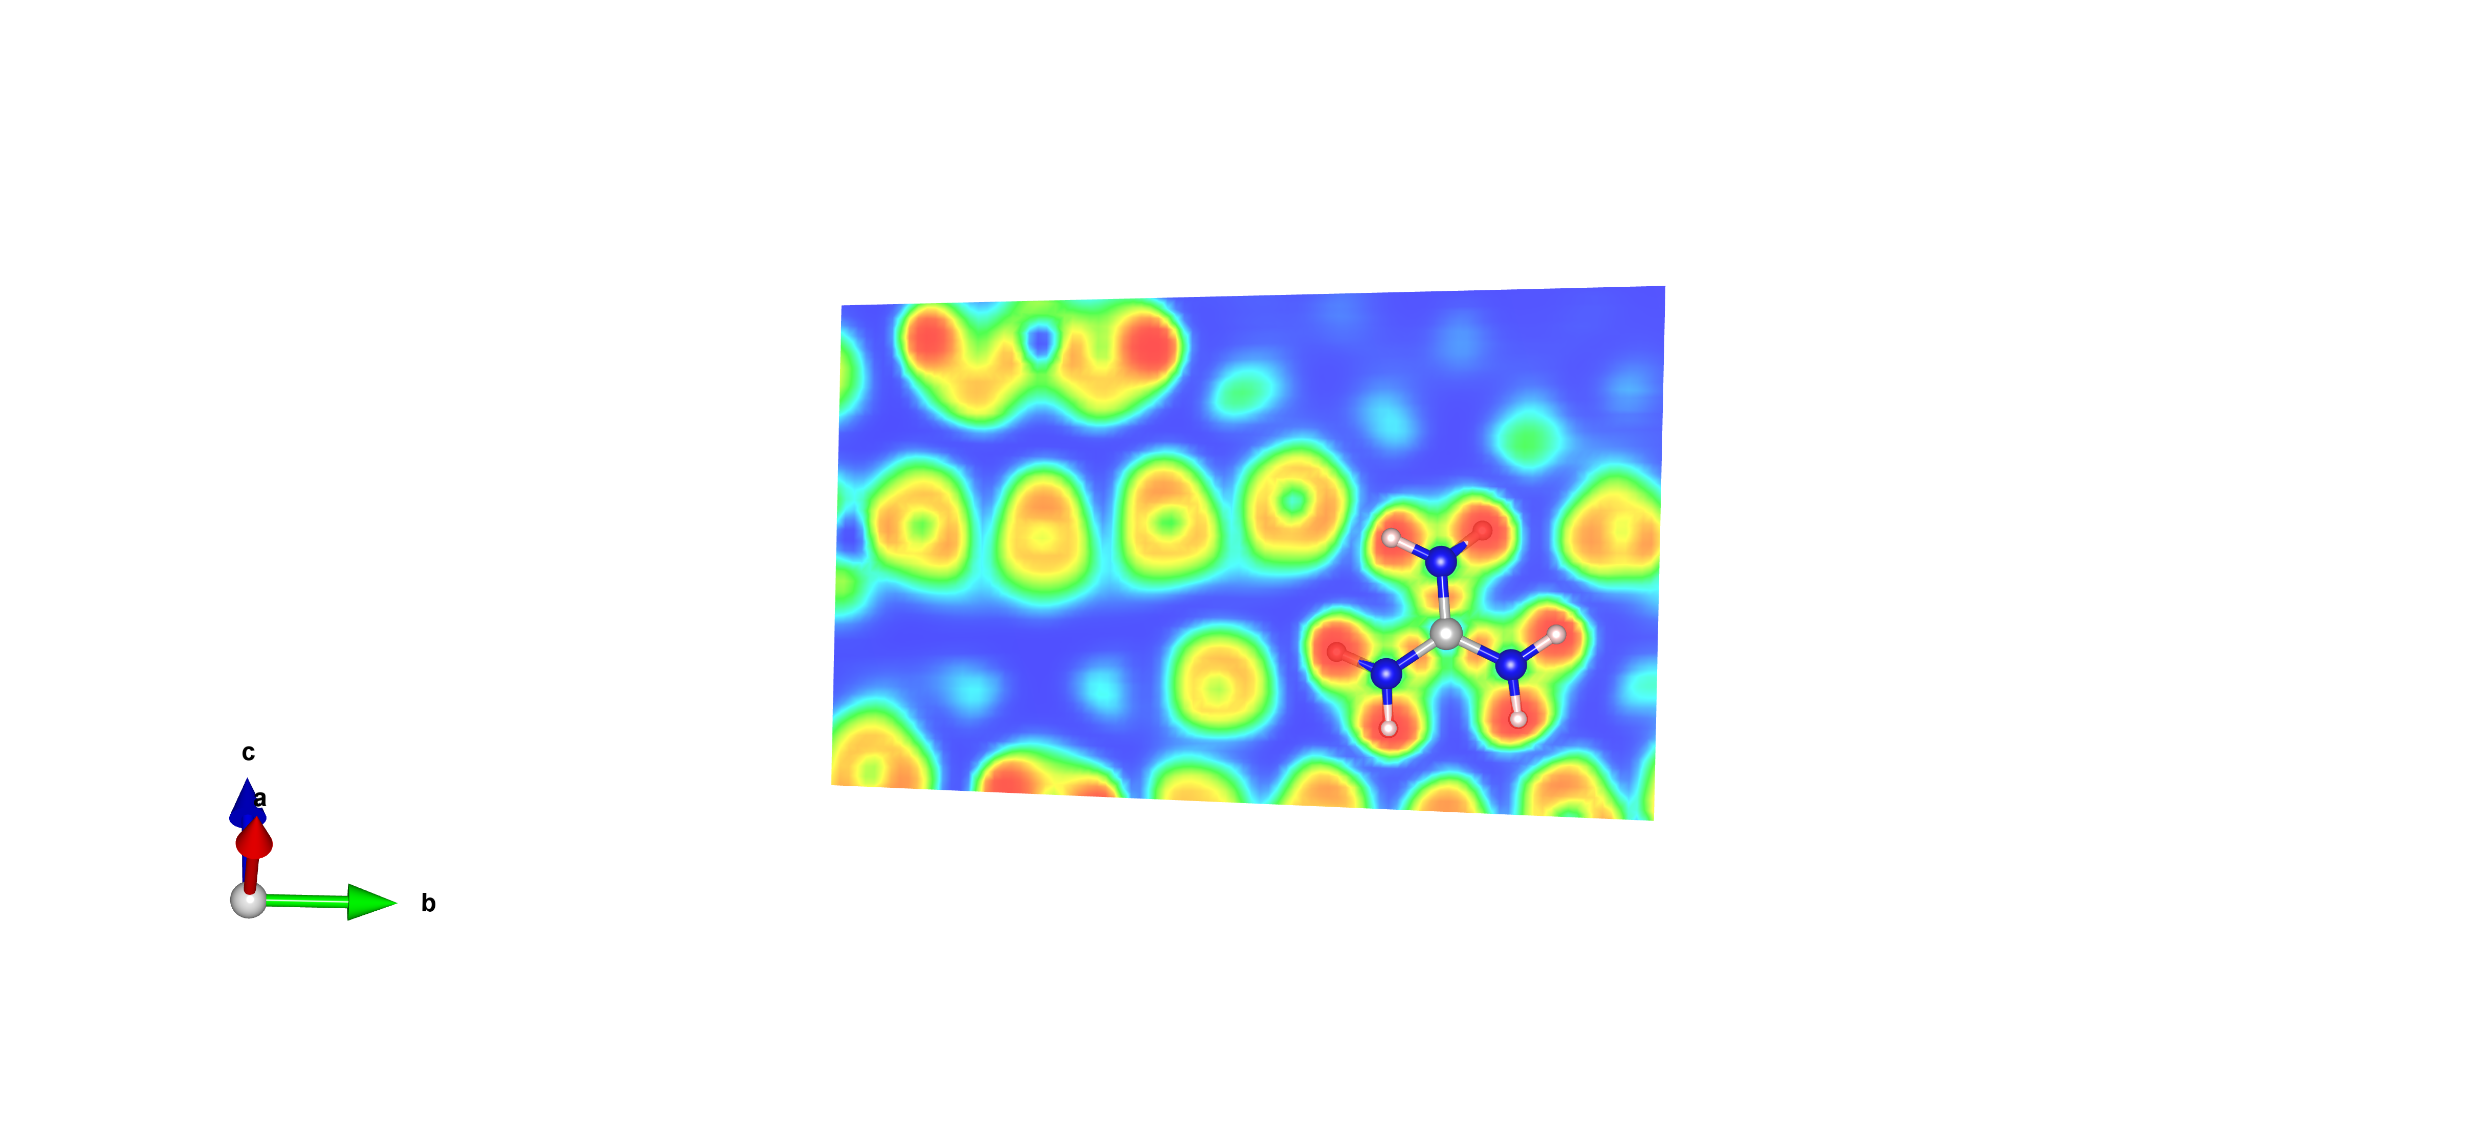


**Figure S6.** The ELF map of 2D [B6O9F]∞ anion layer in [C(NH2)3]B6O9F.


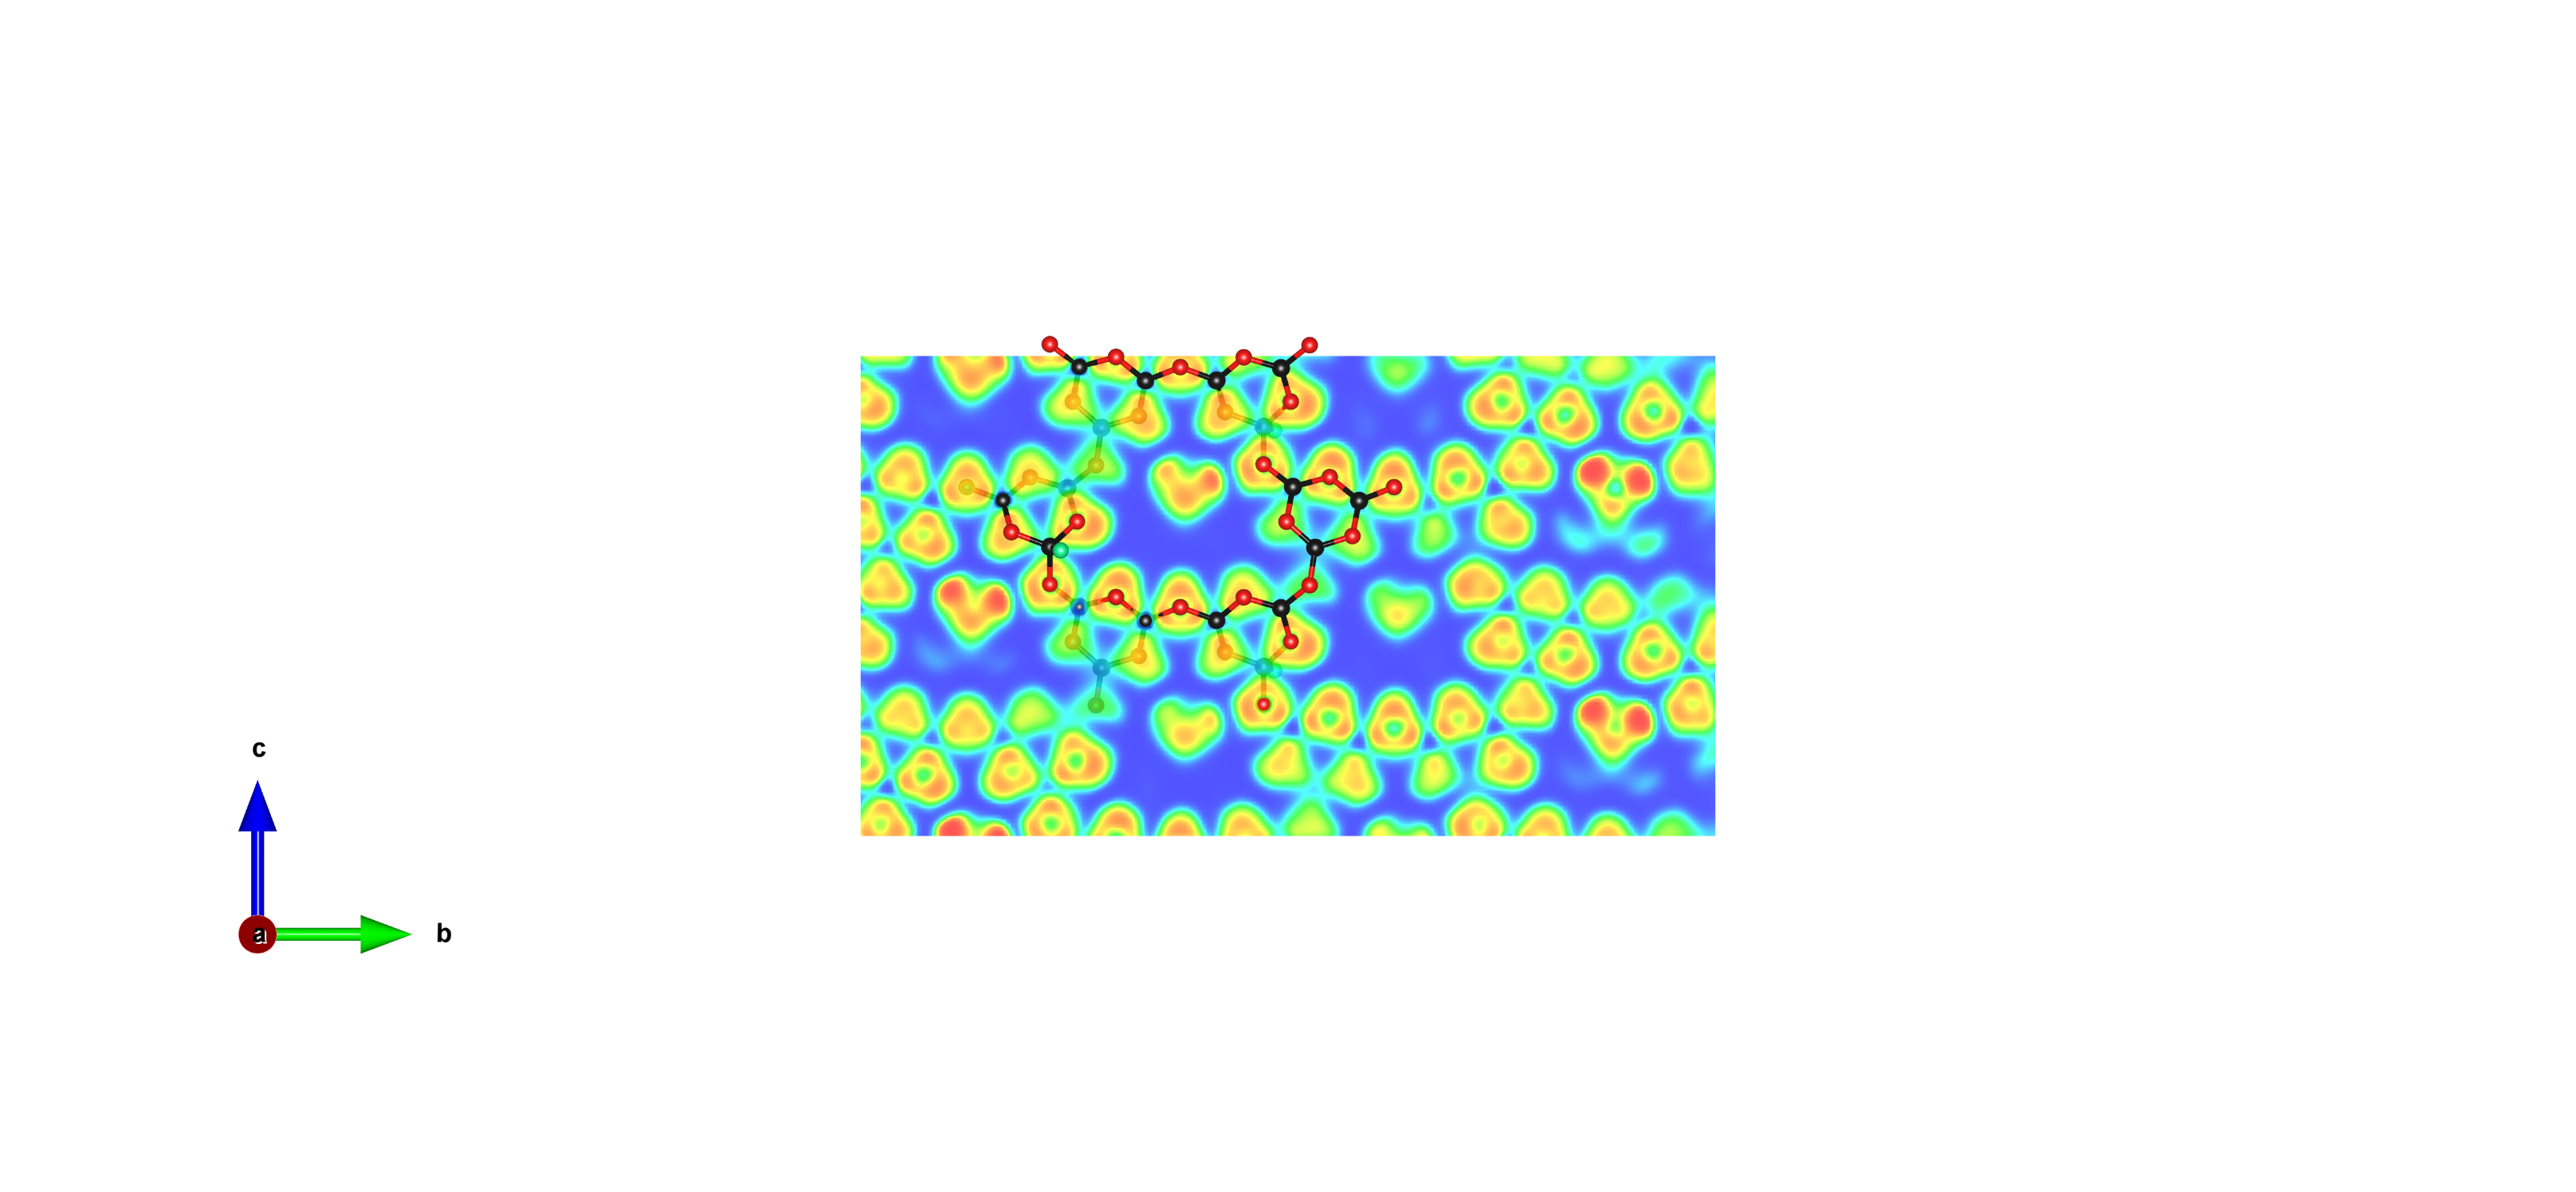


**Figure S7.** The low-lying allotropes of [C(NH2)3]B6O9F. Top and side views of crystal structures for [C(NH2)3]B6O9F with the same anionic frameworks [B6O9F] and different cation [C(NH2)3] functional motifs are presented. Their structure number and convex hull values are below corresponding [C(NH2)3] functional motifs.


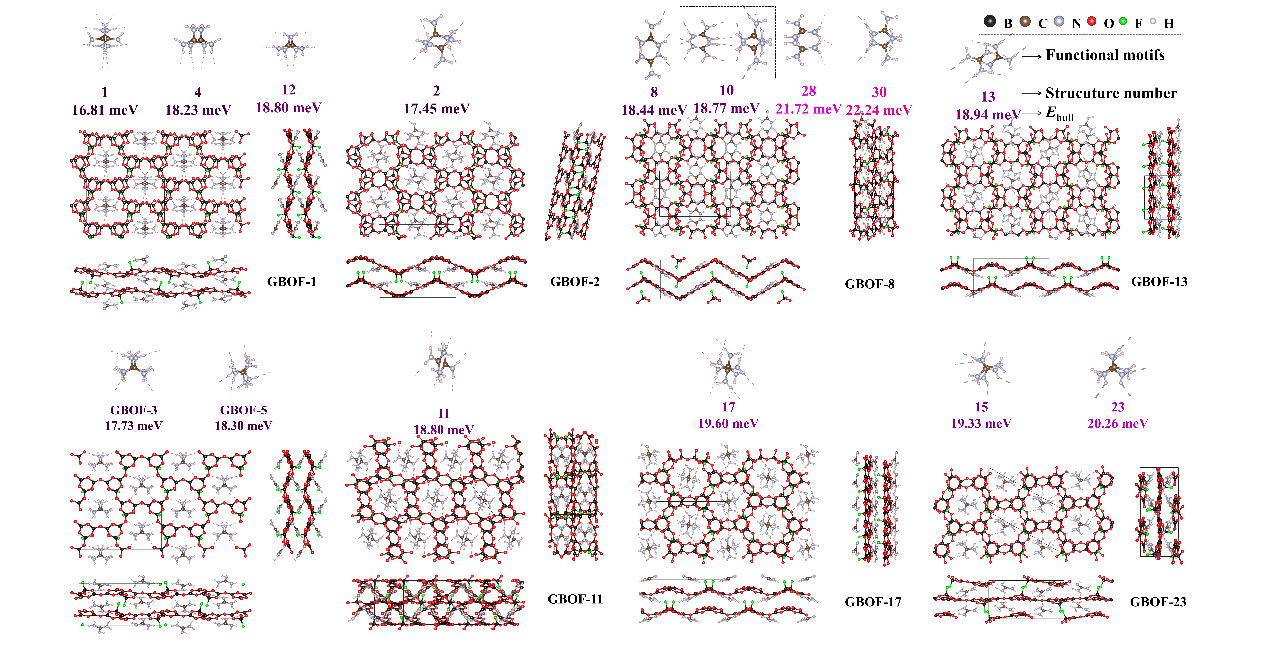


**Figure S8.** Phonon dispersion spectra for predicted stable GBOF-i (i=1-30) calculated with linear response method.


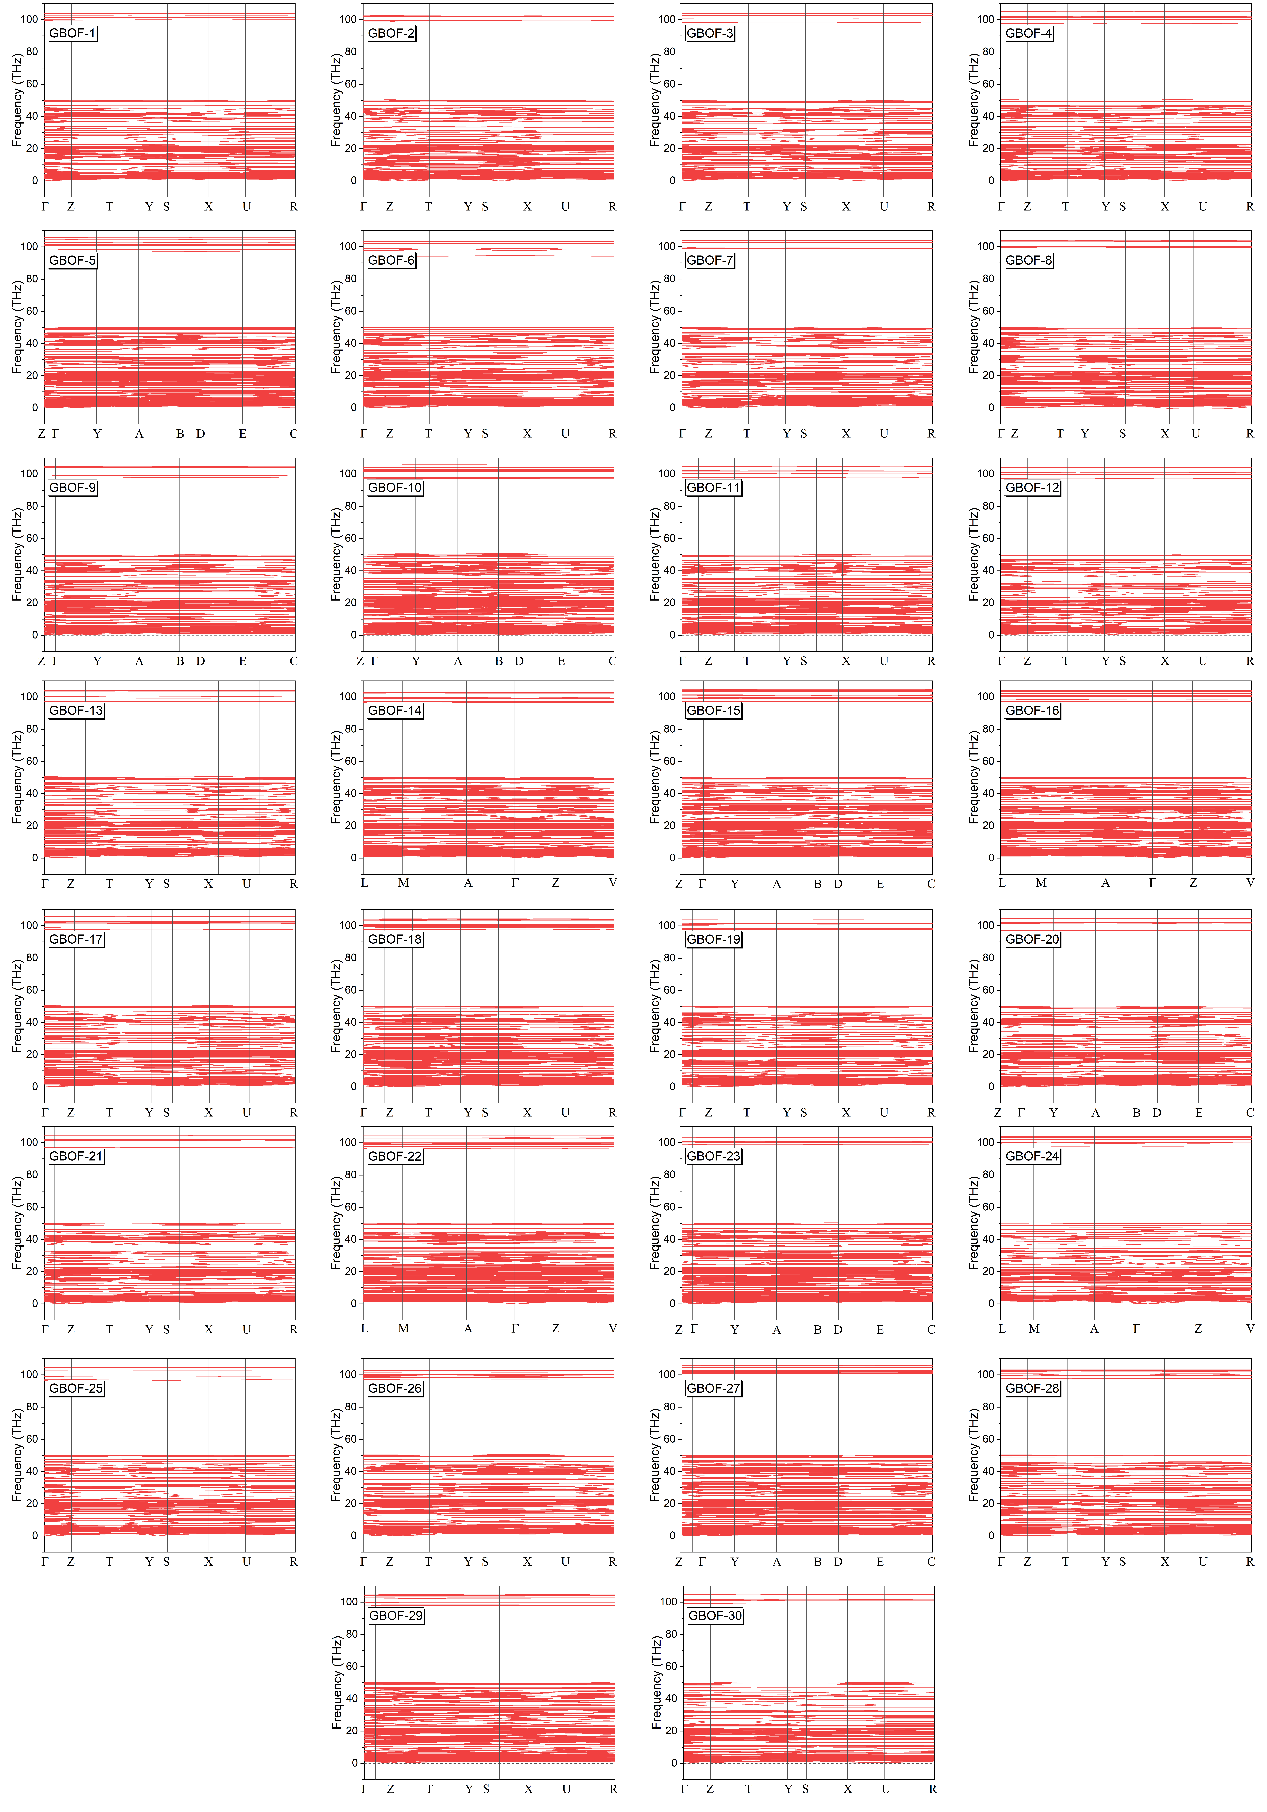


**Figure S9.** The SHG density maps of occupied and unoccupied orbitals of the largest effective NLO coefficient *d*33 in a virtual-electron process of GBOF-i (i=1, 3, 4, 5, 12).


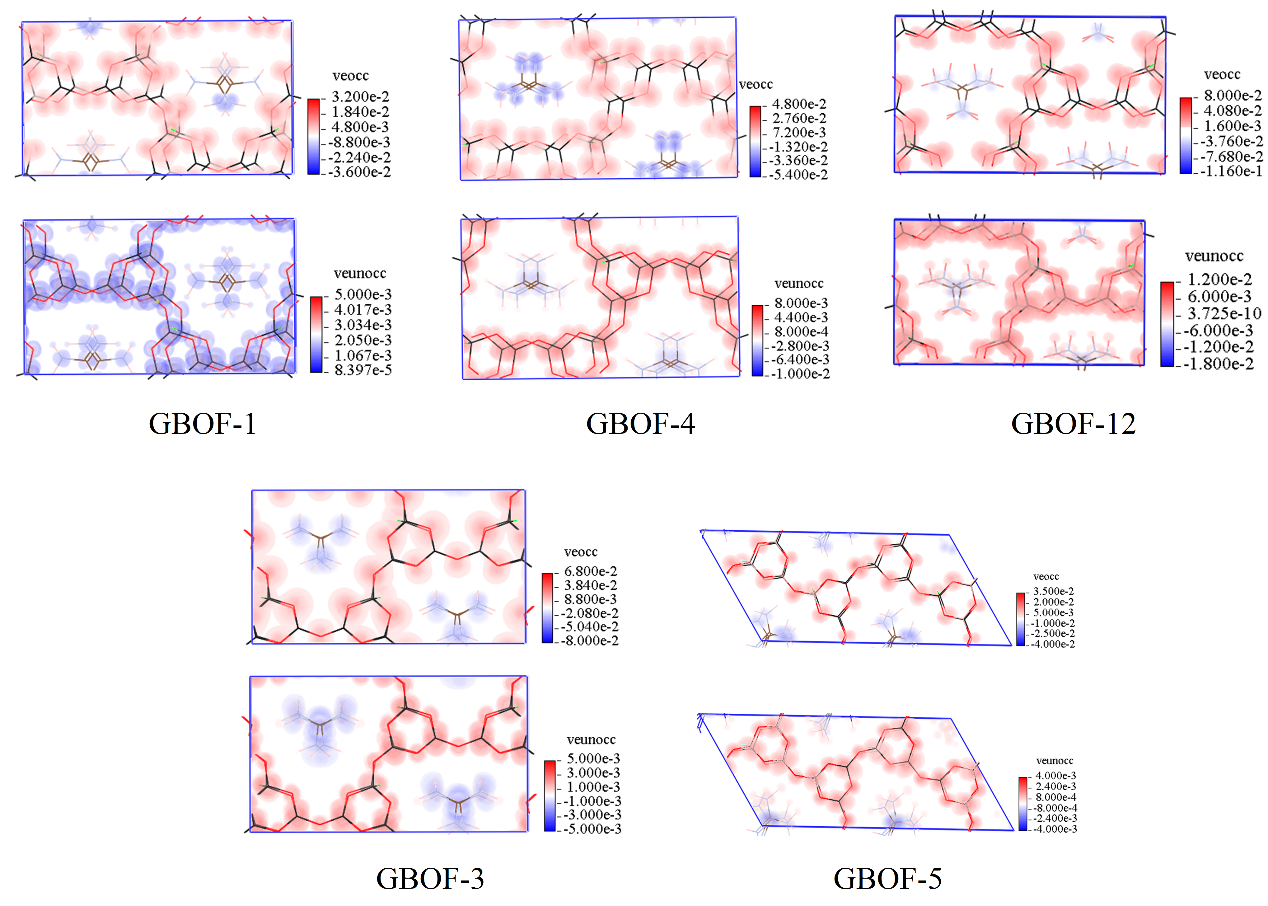

Supplement: Supplementary file 1 [file 055fa2c1f98677d9044c8092.docx]
